# Supplementary material
Source: publisher site journal article supplement (https://www.dovepress.com/article/428503)
Supplement: Supplementary file 1 [file get_supplementary_file.php]

**Based on Weighted gene co-expression network analysis reveals the hub immune infiltration-related genes associated with ulcerative colitis**

Zongbiao Tan1†, Chuan Liu1†, Pengzhan He1†, Yanrui Wu1, Jiao Li1, Jixiang Zhang1, Weiguo Dong1*

1Department of Gastroenterology, Renmin Hospital of Wuhan University, Wuhan 430060, China

*These authors have contributed equally to this work.

#Corresponding author: Prof Weiguo Dong, MD, PhD, Department of Gastroenterology, Renmin Hospital of Wuhan University, No 99 Zhangzhidong Road, Wuhan, 430060, Hubei Province, China. Email address: [dongweiguo@whu.edu.cn](mailto:dongweiguo@whu.edu.cn), Tel: 027-88041911

**Supplementary materials**

**Supplement Figure1.** The immune infiltration analysis in GSE206285 and GSE16879.

**
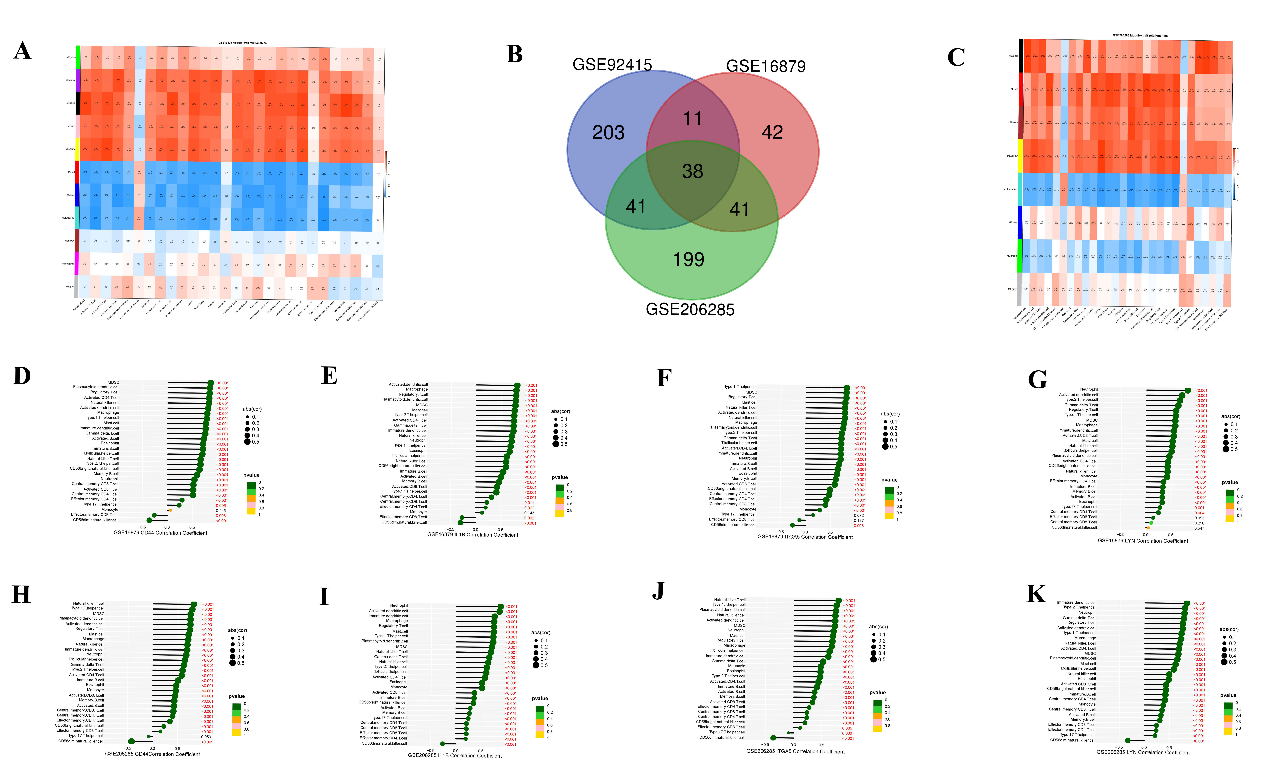
**

**Supplement Figure1.** (A)Results of weighted correlation network analysis of GSE16879. (A) The intersection of modules obtained fromGSE92415, GSE16879, and GSE206285. (C)Results of weighted correlation network analysis of GSE16879. (D-G) Correlation between the expression of CD44, IL1B, LYN and ITGA5 and immune cells (GSE16879). (H-K) Correlation between the expression of CD44, IL1B, LYN and ITGA5 and immune cells (GSE206285).

**Supplement Figure2**.The expression difference and diagnostic values of hub immune infiltration-related genes in GSE206285 and GSE16879.


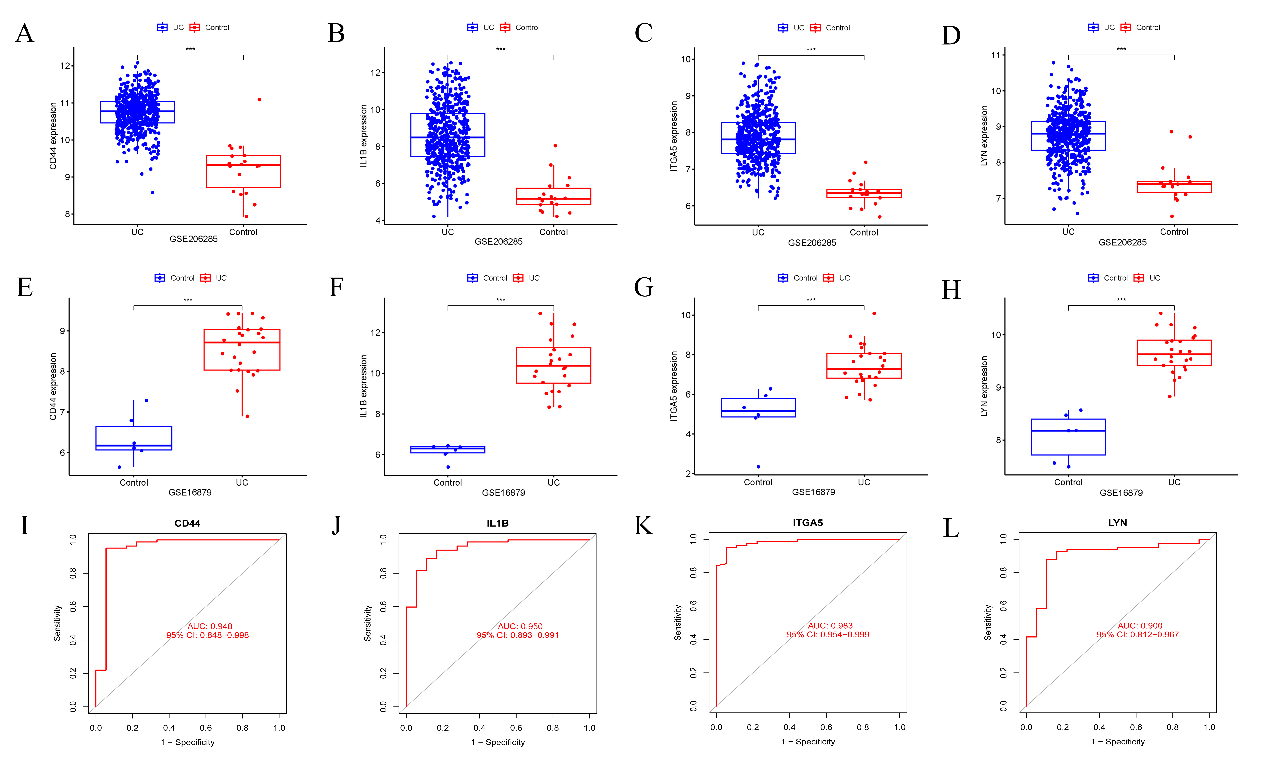


**SupplementFigure2.** (A-D) The expression difference of CD44, IL1B, LYN, and ITGA5 between UC and controls (GSE206285). (E-H) The expression difference of CD44, IL1B, LYN, and ITGA5 between UC and controls (GSE16879). (I-L) Diagnostic values of CD44, IL1B, LYN, and ITGA5 in the GSE16879.
